# Supplementary material for: Synthesis of complementary hierarchical structured Si/C composites with high Si content for lithium-ion batteries
Source: Royal Society of Chemistry journal article supplement (doi:10.1039/c8nr04280b), 2018-01-01
Supplement: c8nr04280b1.pdf [file c8nr04280b1.pdf]

## Supporting Information

# **Synthesis of Complementary Hierarchical Structured Si/C Composites with High Si Content for Lithium-ion Batteries**

Xin-Yang Yue, Zhong Yan, Yun Song, Xiao-Jing Wu, Yong-Ning Zhou\*

Department of Materials Science, Fudan University, Shanghai 200433, China

\*Corresponding Author E-mail: ynzhou@fudan.edu.cn

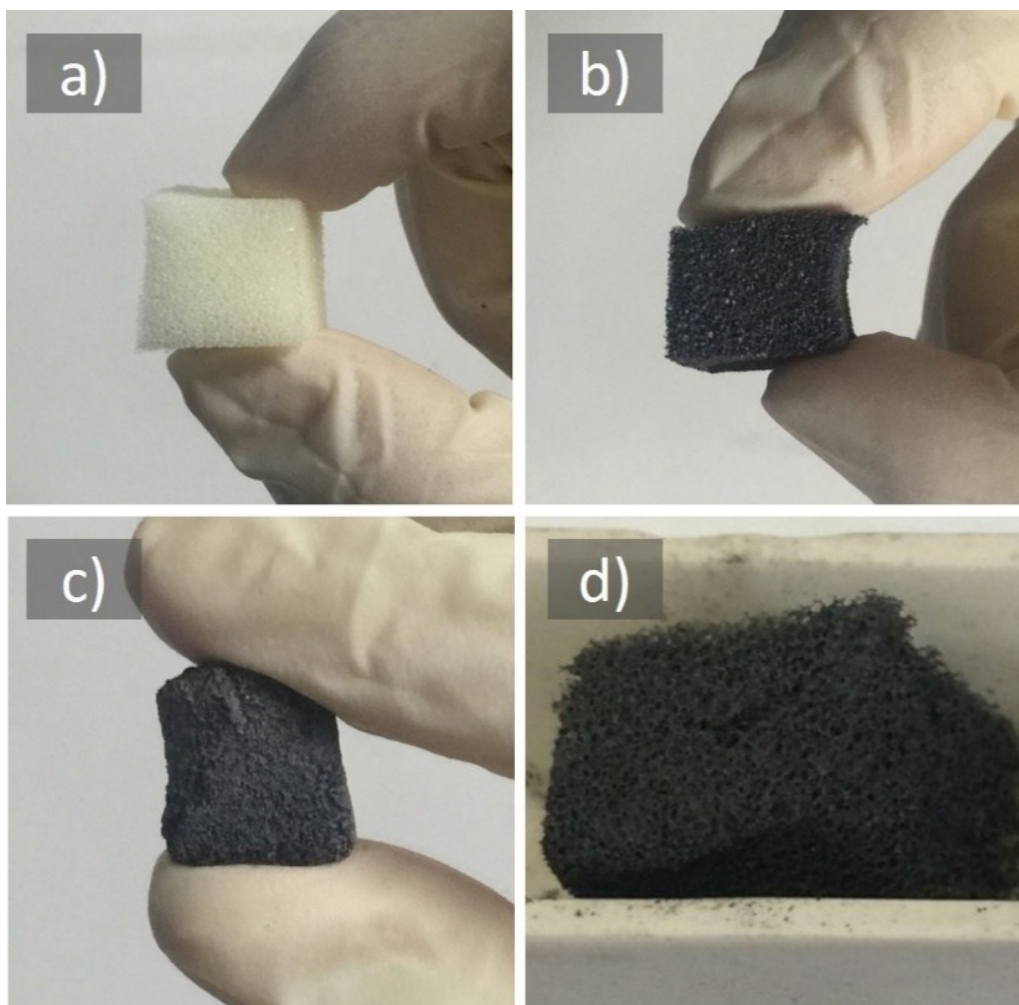

**Fig. S1** Photographs of a) PU sponge; b) sponge-GS; c) DMSiO<sub>2</sub>G before heat treatment and d) DMSiO<sub>2</sub>G after heat treatment.

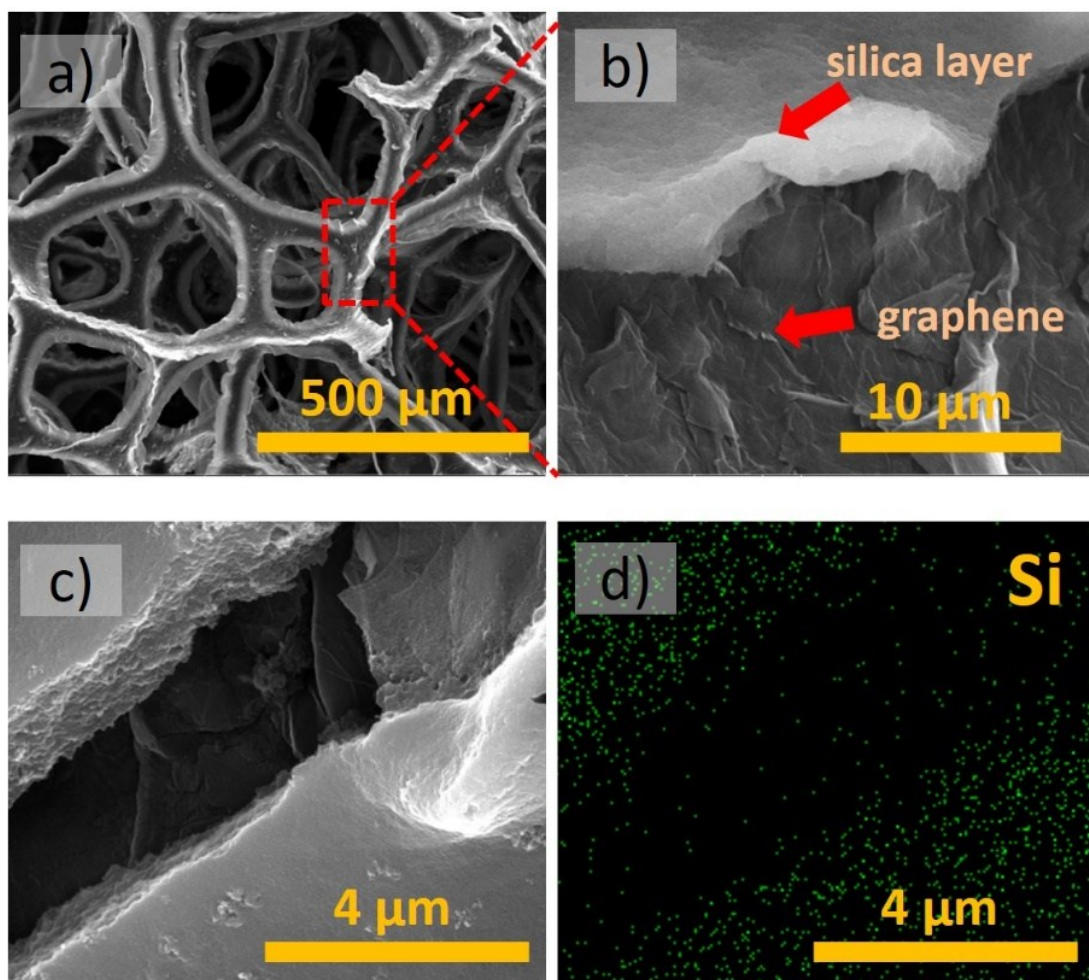

**Fig. S2** a-c) SEM images of DMSiO<sub>2</sub>G-RGO with different magnification. d) EDS image of DMSiO<sub>2</sub>G-RGO.

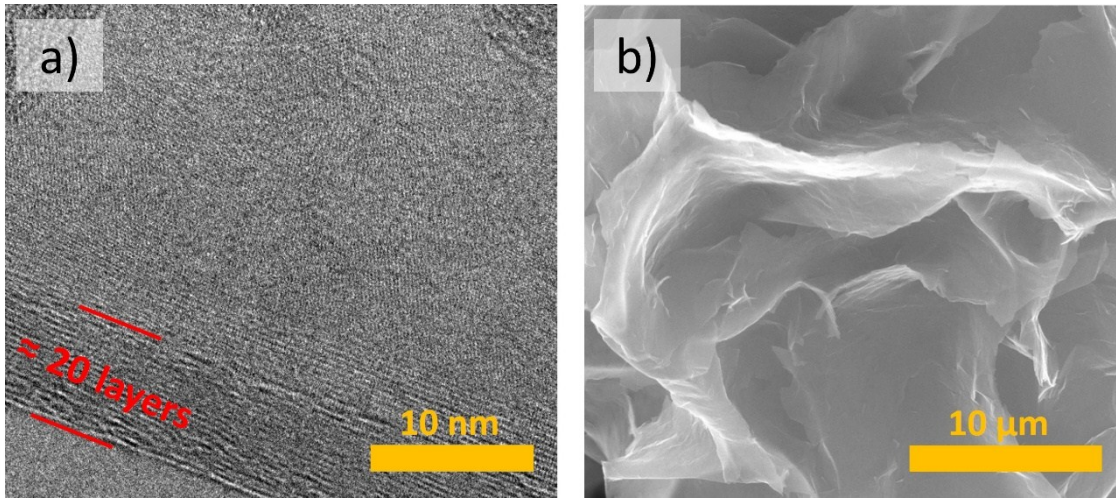

**Fig. S3** a) TEM and b) SEM images of the as-prepared GN.

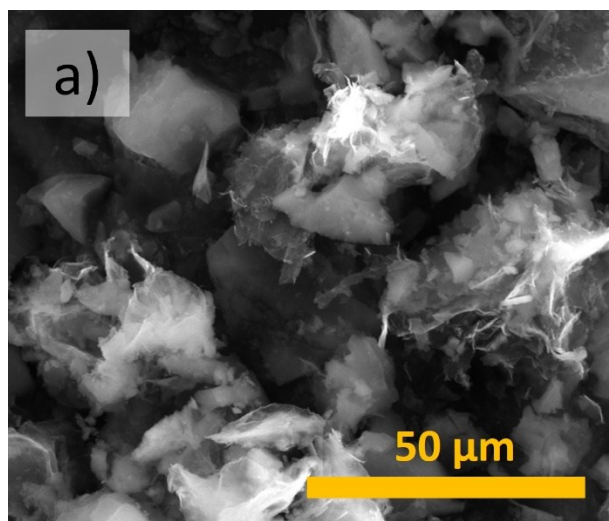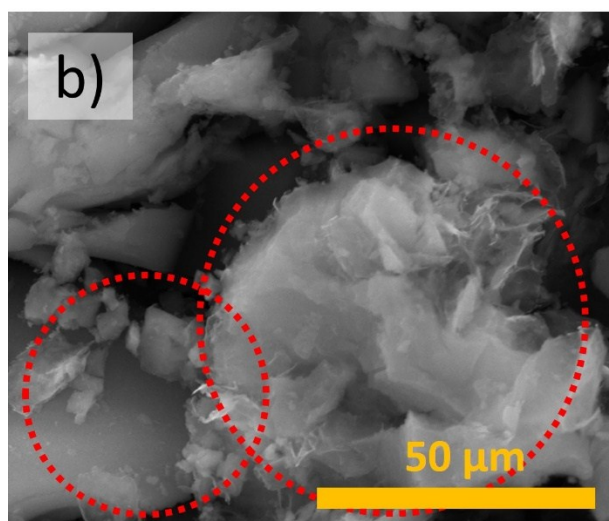

**Fig. S4** a-b) SEM images of SiO<sub>2</sub>/G with different magnifications shows the agglomeration of SiO<sub>2</sub>.

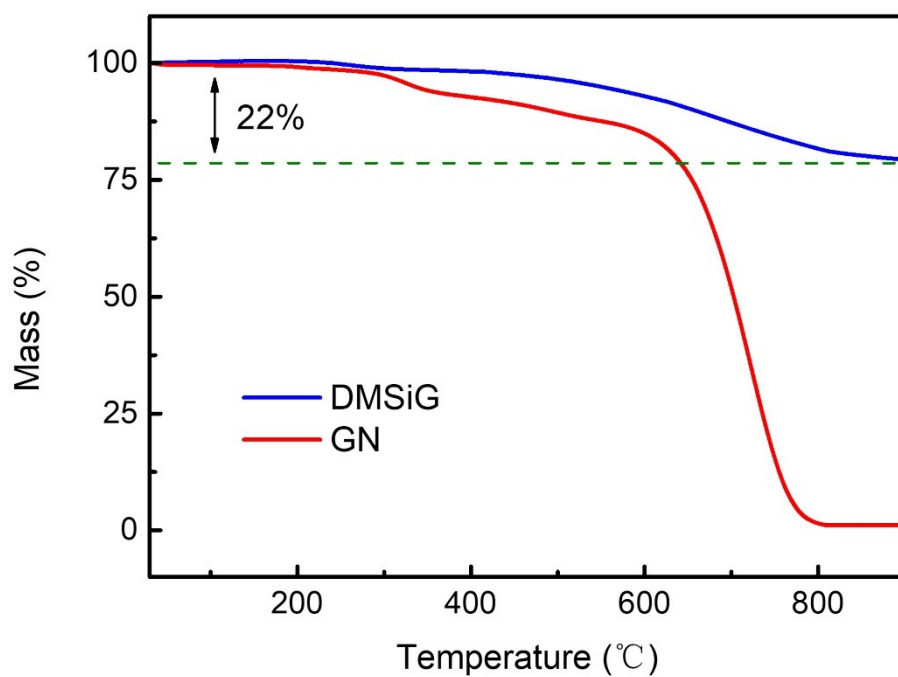

**Fig. S5** TGA curves of DMSiG and GN (from room temperature to 900 °C and the rate is 10°C min<sup>-1</sup>).

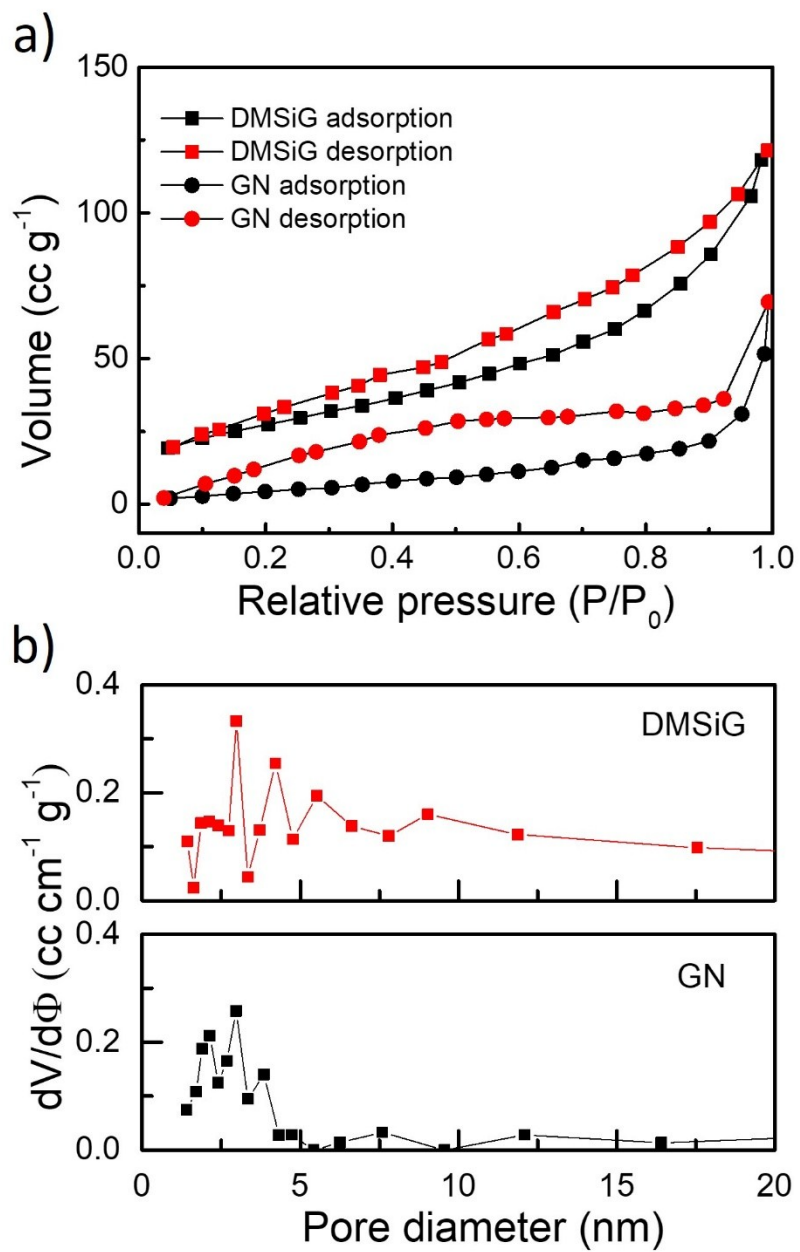

**Fig. S6** a) N<sub>2</sub> adsorption and desorption isotherms of DMSiG and GN. b) The pore size distribution curves of DMSiG and GN.



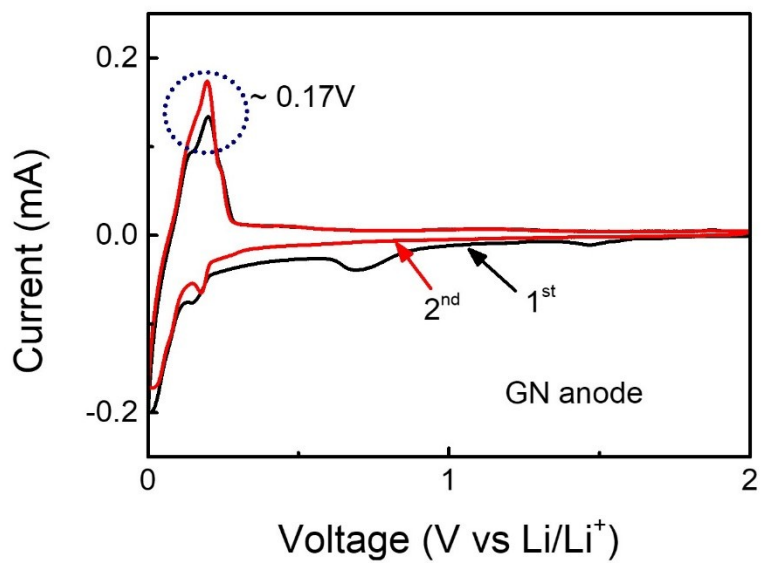

**Fig. S7** CV curves of GN at a scan rate of  $0.2 \text{ mV s}^{-1}$  from 2 to 0.001 V.



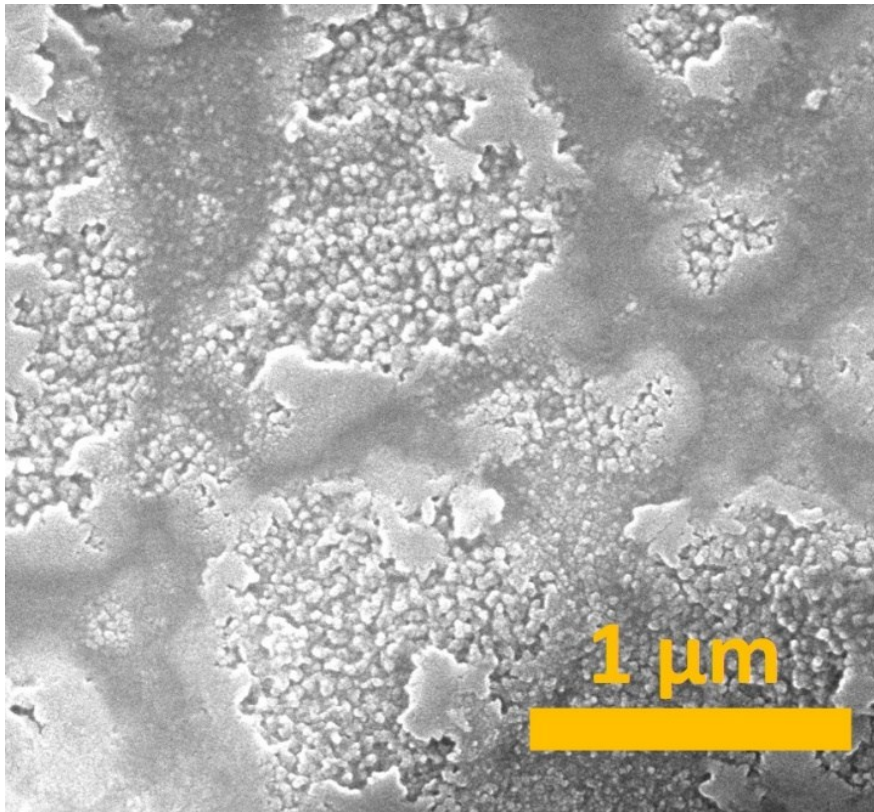

**Fig. S8** SEM image of DMSiG anode after initial discharge.

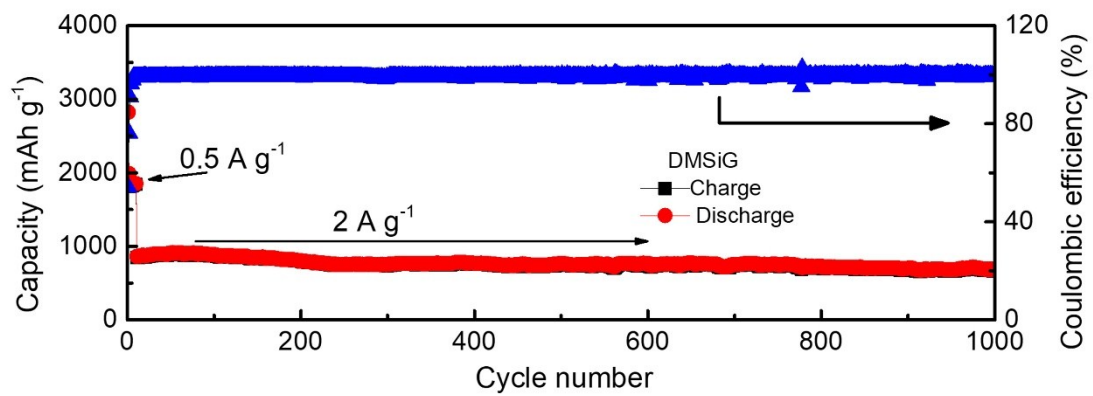

**Fig. S9** Cycle performance of DMSiG at 2 A g<sup>-1</sup> in 1000 cycles

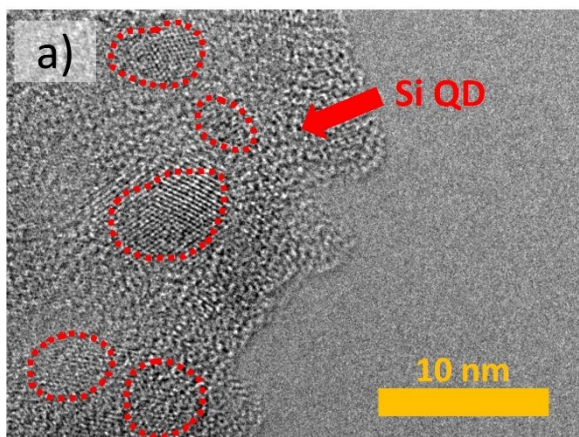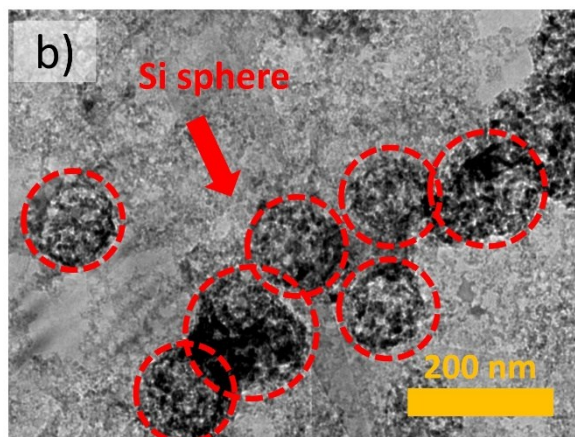

**Fig. S10** a, b) TEM image of DMSiG electrode after 100 cycles.

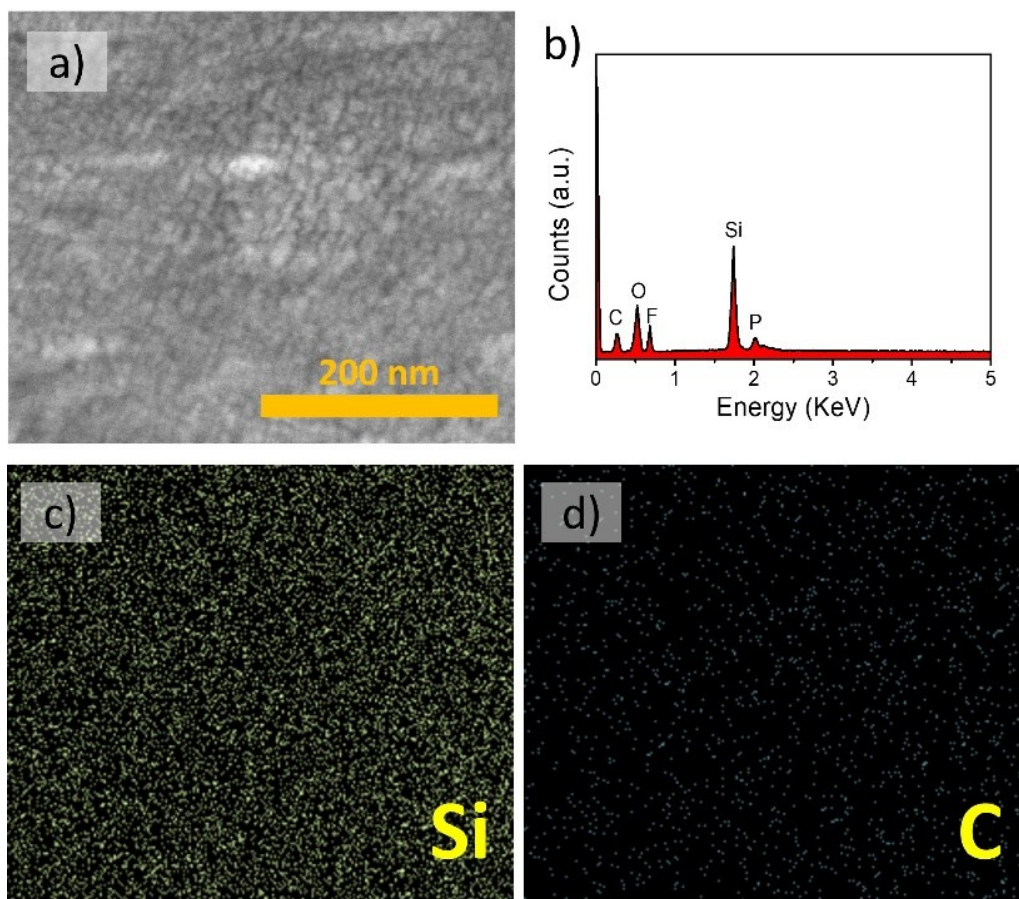

**Fig. S11** (a) SEM image of DMSiG electrode after 100 cycles. (b) the corresponding EDS analysis, and the EDS mapping of (c) silicon, (d) carbon.

**Table S1.** The electrochemical performances of different silicon-carbon composites.

| Composites                                      | Silicon contents (wt.%) | Current density (A g <sup>-1</sup> or C) | Reversible capacity (mAh g <sup>-1</sup> ) | Ref |
|-------------------------------------------------|-------------------------|------------------------------------------|--------------------------------------------|-----|
| Interconnected Porous Silicon/Carbon Composites | 35.9                    | 0.05                                     | 1437                                       | S1  |
| Mesoporous Si/C Nanocomposite                   | 43                      | 0.5                                      | 1864                                       | S2  |
| 3D Graphene-Silicon network                     | 66.8                    | 0.2                                      | 2450                                       | S3  |
| 3D silicon/carbon nanotube capsule              | 75                      | 0.5                                      | 1226                                       | S4  |
| Silicon/TRG                                     | 82                      | 0.2                                      | 1153                                       | S5  |
| Si@crumpled graphene                            | 60                      | 1                                        | 940                                        | S6  |
| <b>DMSiG<br/>(This work)</b>                    | <b>78</b>               | <b>0.1</b>                               | <b>1585.6</b>                              |     |

## References

- S1. Z. Zhang, Y. Wang, W. Ren, Q. Tan, Y. Chen, H. Li, Z. Zhong, F. Su, *Angew. Chem. Int. Ed.*, 2014, 53, 5165-5169.
- S2. R. Zhang, Y. Du, D. Li, D. Shen, J. Yang, Z. Guo, H. K. Liu, A. A. Elzatahry, D. Zhao, *Adv. Mater.*, 2014, 26, 6749-6755.
- S3. B. Li, S. Yang, S. Li, B. Wang, J. Liu, *Adv. Energy Mater.*, 2016, 5, 1500289.
- S4. X. Yue, W. Sun, J. Zhang, F. Wang, K. Sun, *J. Power Sources*, 2016, 329, 422-427.
- S5. X. Zhou, Y. Yin, L. Wan, Y. Guo, *Chem. Commun.*, 2012, 48, 2198-2200.
- S6. J. Luo, X. Zhao, J. Wu, H. D. Jang, H. H. Kung, J. Huang, *J. Phys. Chem. Lett.*, 2012, 3, 1824-1829.
